# Supplementary material for: PIF4 Promotes Expression of HSFA2 to Enhance Basal Thermotolerance in Arabidopsis
Source: MDPI journal article supplement (doi:10.3390/ijms23116017), 2022-05-27
Supplement: s1 [file s1]

Table S1. Primer sequences for qRT-PCR analysis.

| Accession | Gene    | Primer sequence                                              |
|-----------|---------|--------------------------------------------------------------|
| AT3G18780 | Actin2  | F: GCACCCTGTTCTTCTTACCG<br>R: AACCCCTCGTAGATTGGCACA          |
| AT2G26150 | HSFA2   | F: TTTGTTTCAGCAGTTTGCGGTTAT<br>R: TCCGTTTCCTCCCCACATC        |
| AT3G51910 | HSFA7a  | F: AGAGGATCATCAACTGGTGGTAGAG<br>R: AGCCAAACTCTCATCACTAAGCAAC |
| AT4G36990 | HSFB1   | F: GTTCGCCTTCTGAGTCTAATTCTGG<br>R: CACGTTTAAGCTTCTCGTTCTCTCC |
| AT5G03720 | HSP18.1 | F: TTACCGGAGAATGCAAAGATG<br>R: CGGAGATATCGATGGACTTGA         |
| AT4G10250 | HSP22.0 | F: ACCGGTTCCTGATCCATTCAAG<br>R: GCCCTTCTGCTGTTTCTTTCCAGTC    |
| AT3G12580 | HSP70   | F: GTACAAGGCTGAGGATGAAGAACAC<br>R: TTAGATGCGATCTTCTCGTCCTTGA |
| AT4G24190 | HSP90   | F: GATGAACCGAACACTTTTGCTG<br>R: GCATATCACCATCTTCCTCAACG      |
| AT1G74310 | HSP101  | F: GCTTCAAATGAAAGACGTTGCTGTC<br>TCCTTATAGGCCTAGCACCATACAC    |

Table S2. Primer sequences for ChIP-qPCR analysis.

| Accession | Gene  | Primer name                                                              | Primer sequence                                                                                       |
|-----------|-------|--------------------------------------------------------------------------|-------------------------------------------------------------------------------------------------------|
| AT5G62690 | TUB2  | TUB2-ChIP-F<br>TUB2-ChIP-R                                               | ACAAACACAGAGAGGAGTGAGCA<br>ACGCATCTTCGGTTGGATGAGTGA                                                   |
| AT1G37110 | TA3   | TA3 retrotransposon-ChIP-F<br>TA3 retrotransposon-ChIP-R                 | CTGCGTGGAAGTCTGTCAAA<br>CTATGCCACAGGGCAGTTTT                                                          |
| AT2G26150 | HSFA2 | HSFA2-ChIP-P1-F<br>HSFA2-ChIP-P1-R<br>HSFA2-ChIP-P2-F<br>HSFA2-ChIP-P2-R | GTTGTGTTTGGGGAAGAACCGT<br>ATATCTCGTGC GTGTCTCCA<br>CTGGAACATTGTCTTGTCTTGTGCG<br>ATTGAGGCGTGGAGGAGAGAG |
